# Supplementary material for: Amine–imine palladium catalysts for living polymerization of ethylene and copolymerization of ethylene with methyl acrylate: incorporation of acrylate units into the main chain and branch end
Source: Royal Society of Chemistry journal article supplement (doi:10.1039/c5py01743b), 2015-12-08
Supplement: c5py01743b1.pdf [file c5py01743b1.pdf]

# Supporting Information

## **Amine-imine palladium catalysts for living polymerization of ethylene and copolymerization of ethylene with methyl acrylate: Incorporation of acrylate units into main chain and branch end**

Haibin Hu, Darui Chen, Haiyang Gao,\* Liu Zhong, and Qing Wu\*

PCFM Lab, GD HPPC Lab, DSAPM Lab, School of Chemistry and Chemical Engineering, Sun Yat-Sen University, Guangzhou 510275, China.

**Scheme S1.** *Cis-* and *trans-*isomers of amine-imine palladium complexes

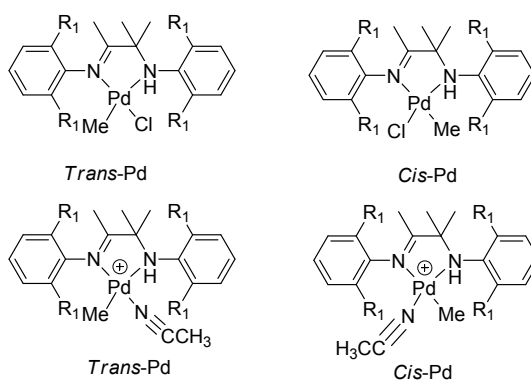

**Table S1.** Crystal data and structure refinement for palladium complexes

|                                                 | <b>1</b>                                                          | <b>C1·0.5H<sub>2</sub>O</b>                                                         |
|-------------------------------------------------|-------------------------------------------------------------------|-------------------------------------------------------------------------------------|
| Empirical formula                               | C <sub>30</sub> H <sub>47</sub> ClN <sub>2</sub> Pd               | C <sub>64</sub> H <sub>62</sub> BF <sub>24</sub> N <sub>3</sub> O <sub>0.5</sub> Pd |
| Formula weight                                  | 577.55                                                            | 1454.38                                                                             |
| Crystal system                                  | Monoclinic                                                        | Triclinic                                                                           |
| Space group                                     | <i>P</i> 2 <sub>1</sub> / <i>n</i>                                | <i>P</i> -1                                                                         |
| a (Å)                                           | 15.919(2)                                                         | 12.1356(2)                                                                          |
| b (Å)                                           | 11.3592(16)                                                       | 13.0597(2)                                                                          |
| c (Å)                                           | 17.894(3)                                                         | 22.3007(3)                                                                          |
| α (deg)                                         | 90                                                                | 103.2350(10)                                                                        |
| β (deg)                                         | 114.701(2)                                                        | 98.4960(10)                                                                         |
| γ (deg)                                         | 90                                                                | 101.5750(10)                                                                        |
| Volume (Å <sup>3</sup> )                        | 2939.7(7)                                                         | 3300.29(9)                                                                          |
| Z                                               | 4                                                                 | 2                                                                                   |
| D(calc.) (g/cm <sup>3</sup> )                   | 1.305                                                             | 1.464                                                                               |
| F(000)                                          | 1216                                                              | 1476                                                                                |
| θ range (deg)                                   | 2.19 to 27.05                                                     | 1.65 to 24.67                                                                       |
| Index ranges                                    | -20 ≤ <i>h</i> ≤ 16<br>-14 ≤ <i>k</i> ≤ 12<br>-22 ≤ <i>l</i> ≤ 15 | -14 ≤ <i>h</i> ≤ 14<br>-15 ≤ <i>k</i> ≤ 15<br>-26 ≤ <i>l</i> ≤ 26                   |
| Reflections collected/unique                    | 14657/6309<br>( <i>R</i> <sub>int</sub> = 0.0261)                 | 48203/10990<br>( <i>R</i> <sub>int</sub> = 0.0572)                                  |
| Data completeness                               | 97.6 %                                                            | 97.8%                                                                               |
| Data/restraints/parameters                      | 6309/0/339                                                        | 10990/35/909                                                                        |
| Goodness-of-fit on <i>F</i> <sup>2</sup>        | 1.021                                                             | 1.069                                                                               |
| Final R indices [ <i>I</i> > 2σ( <i>I</i> )]    | <i>R</i> <sub>1</sub> = 0.0308<br><i>wR</i> <sub>2</sub> = 0.0716 | <i>R</i> <sub>1</sub> = 0.0706<br><i>wR</i> <sub>2</sub> = 0.1780                   |
| R indices (all data)                            | <i>R</i> <sub>1</sub> = 0.0506<br><i>wR</i> <sub>2</sub> = 0.0807 | <i>R</i> <sub>1</sub> = 0.0722<br><i>wR</i> <sub>2</sub> = 0.1794                   |
| Largest diff. peak and hole (eÅ <sup>-3</sup> ) | 0.498/-0.425                                                      | 2.202/-1.329                                                                        |

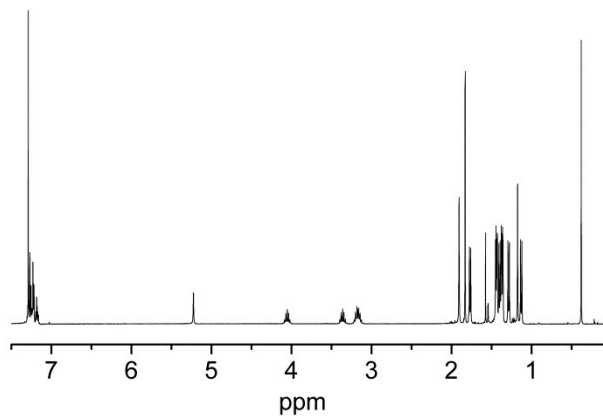

**Figure S1.** <sup>1</sup>H NMR spectrum of palladium complex 1

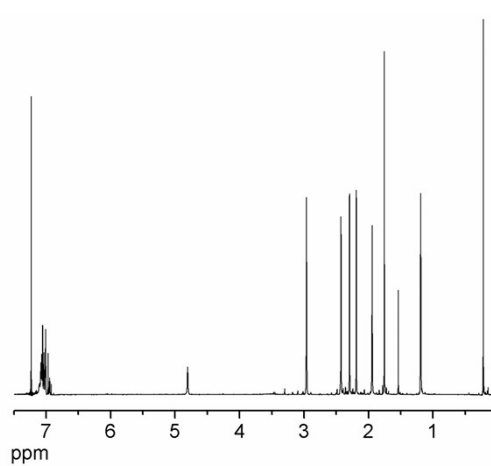

**Figure S2.** <sup>1</sup>H NMR spectrum of palladium complex 2

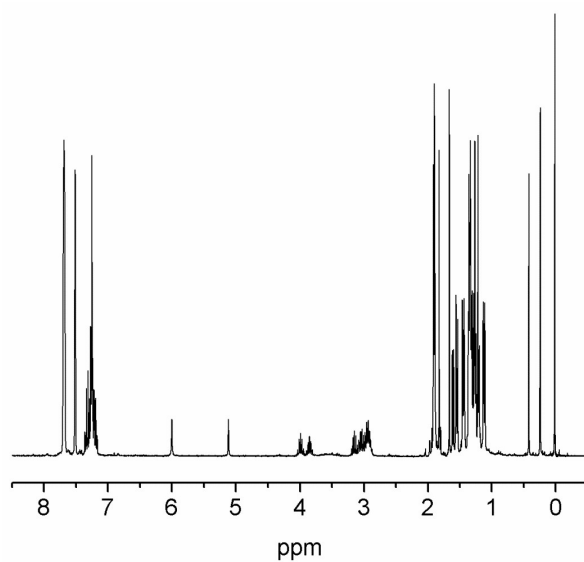

**Figure S3.** <sup>1</sup>H NMR spectrum of palladium complex C1

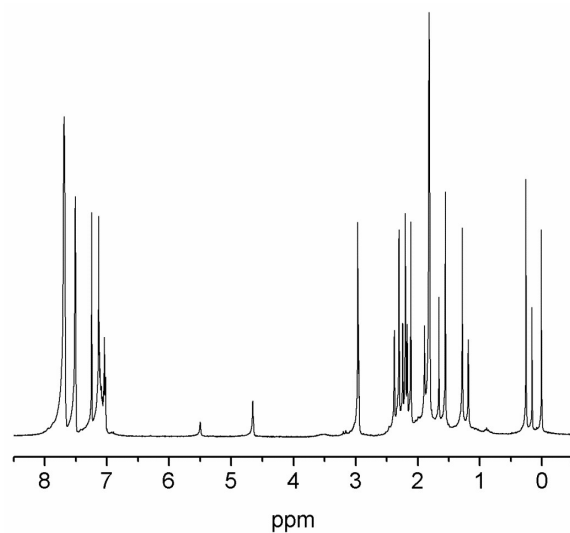

**Figure S4.**  $^1\text{H}$  NMR spectrum of palladium complex **C2**

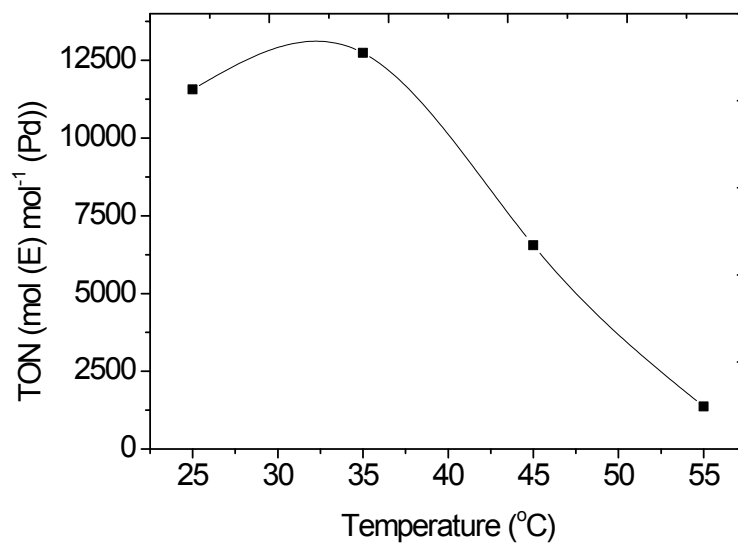

**Figure S5.** Influence of reaction temperature on ethylene polymerization activity with  $\alpha$ -diimine palladium **C3**. (Conditions: 10  $\mu\text{mol}$  Pd catalyst, 20 atm ethylene pressure 58 mL toluene and 2 mL  $\text{CH}_2\text{Cl}_2$ , 4 h.)

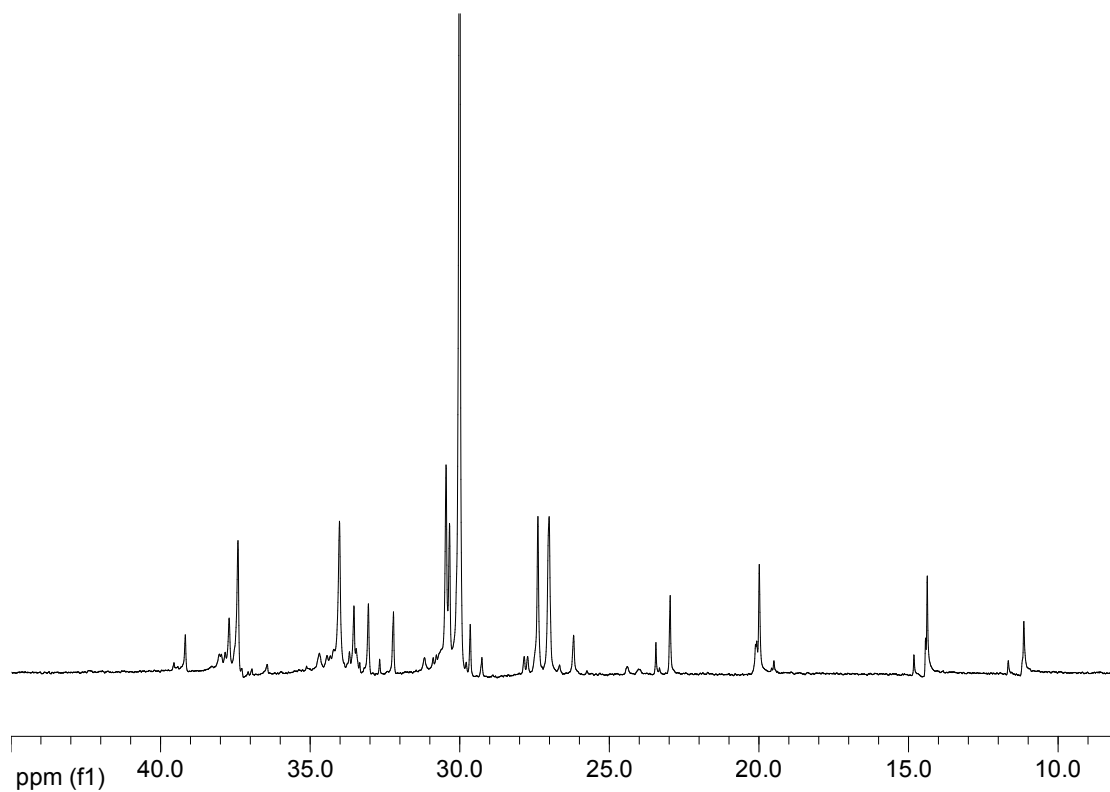

**Figure S6.** <sup>13</sup>C NMR spectrum of the PE obtained by **C1** (entry 2 in Table 1)

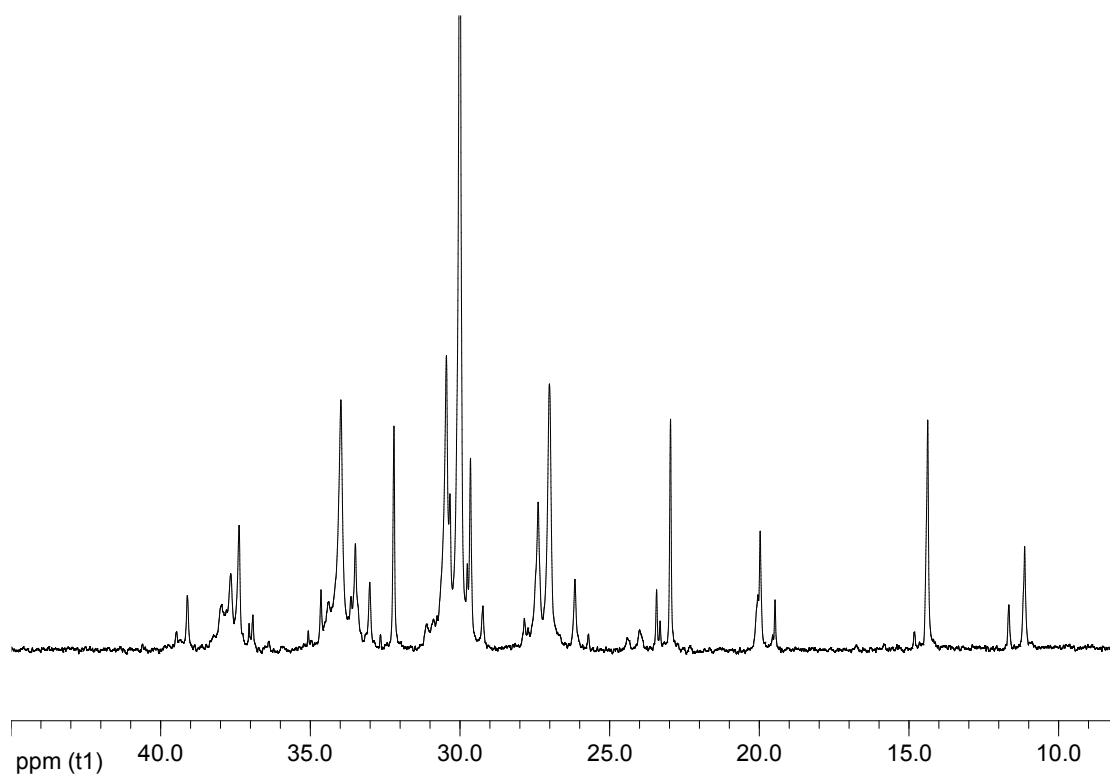

**Figure S7.** <sup>13</sup>C NMR spectrum of the PE obtained by **C2** (entry 5 in Table 1)

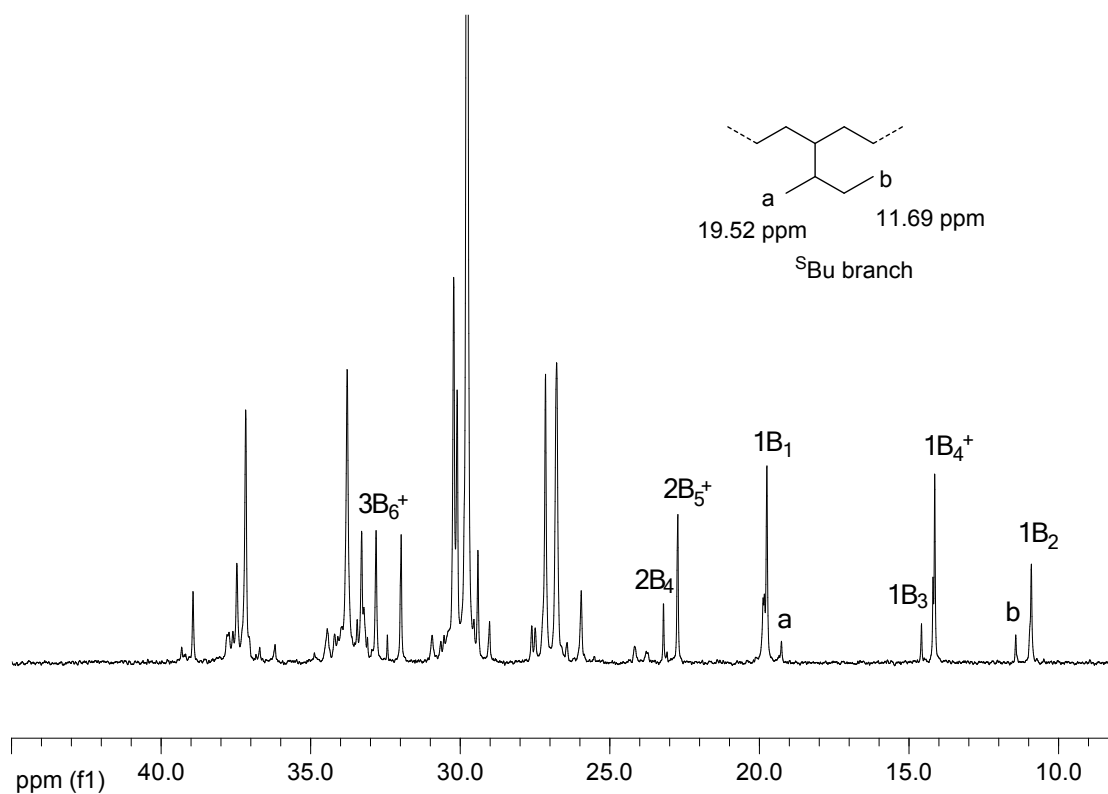

**Figure S8.**  $^{13}\text{C}$  NMR spectrum of the PE obtained by **C3** (entry 12 in Table 1)

**Table S2.** Branching distribution of PE samples obtained by different palladium catalysts

| Entry | Cat.      | Branching distribution (/1000C) |      |     |      |     |      |                        | BD (/1000C) |
|-------|-----------|---------------------------------|------|-----|------|-----|------|------------------------|-------------|
|       |           | Me                              | Et   | Pr  | Bu   | Am  | Lg   | $^{\text{s}}\text{Bu}$ |             |
| 2     | <b>C1</b> | 53.9                            | 14.6 | 3.7 | 8.8  | 2.4 | 16.1 | 2.7                    | 102.2       |
| 5     | <b>C2</b> | 53.1                            | 17.8 | 4.2 | 12.0 | 6.6 | 20.1 | 8.2                    | 122.0       |
| 12    | <b>C3</b> | 54.2                            | 13.8 | 4.0 | 9.7  | 5.0 | 18.4 | 5.5                    | 110.6       |

Branching density is determined by  $^{13}\text{C}$  NMR spectroscopy in number of branches per 1000C according to previous reports (*Macromolecules*, **1999**, 32, 1620, *Science* **1999**, 283, 2059, *ACS Catal.* **2015**, 5, 456).

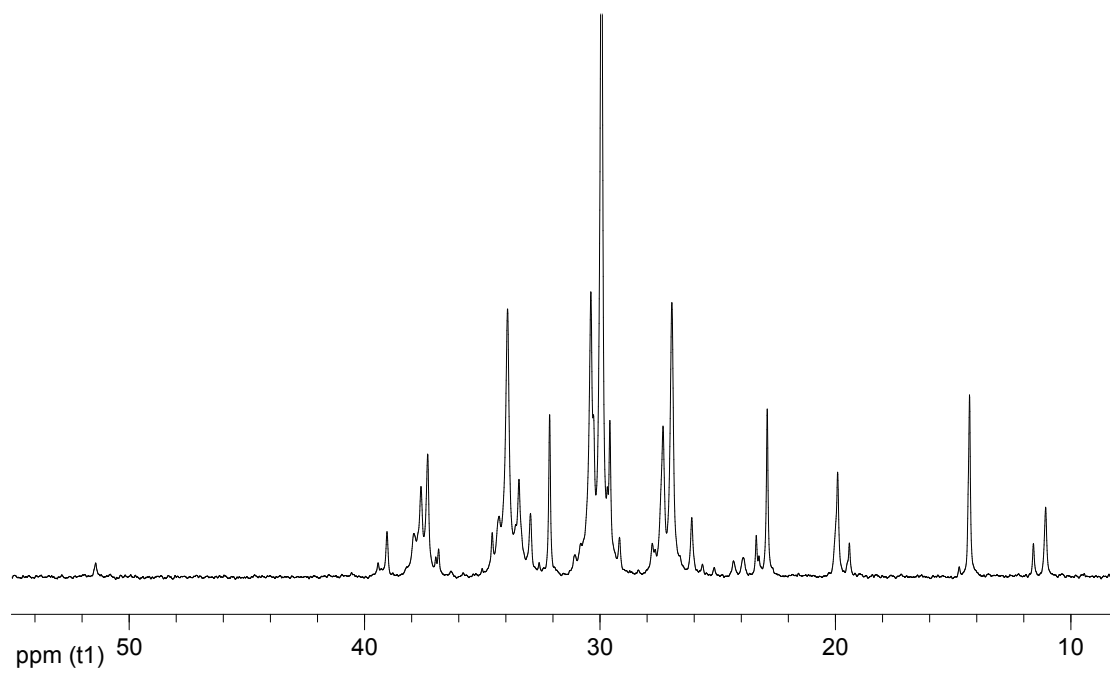

**Figure S9.**  $^{13}\text{C}$  NMR spectrum of the E-MA copolymer obtained by **C3**.



## Synthesis of cationic MA chelate palladium complexes

To a solution of complex **1** (0.44 g, 0.76 mmol) in dry  $\text{CH}_2\text{Cl}_2$  (20 mL) was added NaBARF (0.70 g, 0.79 mmol) and MA (2 mL) under nitrogen atmosphere, and the reaction mixture was stirred for 24 h at room temperature. Sodium chloride was removed from the reaction mixture via filtration, yielding a clear solution. The  $\text{CH}_2\text{Cl}_2$  was removed in vacuum, and the product was precipitated by 30 mL hexane. The resulting solid was filtered through Celite, washed with  $3 \times 10$  mL hexane and dried in vacuum.

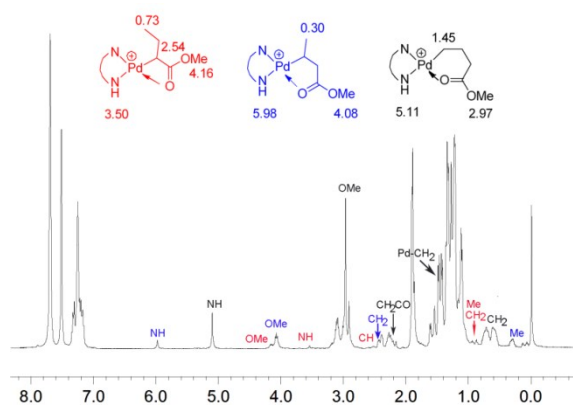

**Figure S10.**  $^1\text{H}$  NMR spectrum of MA chelate amine-imine palladium complexes (N $\cap$ NH is amine-imine ligand).
